# Supplementary material for: The Duplicated Y-specific amhy Gene Is Conserved and Linked to Maleness in Silversides of the Genus Odontesthes
Source: PubMed Central journal article supplement (PMC6770987; doi:10.3390/genes10090679), 2019-09-05
Supplement: genes-10-00679-s001.pdf [file genes-10-00679-s001.pdf]

## Supplemental Material

**Table S1.** List of primers used to amplify and sequence the *cytb* gene and the homologues of *amha* and *amhy*.

| Purpose                                      | Oligo name | Oligo sequence (5' – 3')                             |
|----------------------------------------------|------------|------------------------------------------------------|
| <i>cytb</i><br>amplification                 | cytbfw     | ACCGTTGTATTCAACTACAAGAACC                            |
|                                              | cytbrv     | GCTACTAGTGCATTGTCATTTCGAG                            |
| <i>amha</i><br>amplification                 | Amha Fw    | ACGCGGGTCACACAGGCGTTTC                               |
|                                              | Amha Rv    | TAACTAGTCATACTTTTCATTTAATCTATAAAG<br>ATTCAGAATGCTACA |
| <i>amhy</i><br>amplification                 | Amhy Fw    | GCACGTCGGAGGTCGGAGTTTC                               |
|                                              | Amhy Rv    | TGACACTCAGCAAGGGTTACGGCAAA                           |
| <i>amhy</i> and<br><i>amha</i><br>Sequencing | Amh Fw1    | GACCTCCCTCGGTCCCCTTT                                 |
|                                              | Amh Fw2    | GAGGCAAACGTGGATCCCAG                                 |
|                                              | Amh Rv1    | GTCACCGCCTGTGAGGGGACTTTCAAAGGTGA                     |
|                                              | Amh Rv2    | GTGCACACGACATATGACCATGA                              |
|                                              | Amh Rv3    | GTCTCGCTGGAGGATAAGCCAA                               |
|                                              | Amh Rv4    | CTGCATGTTATATGCATGGGCC                               |
